# Supplementary material for: Cleavage of ethers and demethylation of lignin in acidic concentrated lithium bromide (ACLB) solution
Source: Royal Society of Chemistry journal article supplement (doi:10.1039/d0gc02581j), 2020-01-01
Supplement: d0gc02581j1.pdf [file d0gc02581j1.pdf]

Supporting information for:

## Cleavage of ethers and demethylation of lignin in acidic concentrated lithium bromide (ACLB) Solution

Zheng Li<sup>1</sup>, Eka Sutandar<sup>1</sup>, Thomas Goihl<sup>1</sup>, Xiao Zhang<sup>2</sup>, and Xuejun Pan<sup>1,\*</sup>

<sup>1</sup> Department of Biological Systems Engineering, University of Wisconsin-Madison, 460 Henry Mall, Madison, WI 53706, USA

<sup>2</sup> School of Chemical Engineering and Bioengineering, Washington State University, 2710 University Drive, Richland, WA 99354, USA

\* Corresponding author, [xpan@wisc.edu](mailto:xpan@wisc.edu)

**Table S1** Effect of acid concentration, temperature, and time on demethylation of creosol in the ACLB system

| Entry | System       | T (°C) | T (h) | Creosol conversion (%) | 4-Methylcatechol Yield (%) |
|-------|--------------|--------|-------|------------------------|----------------------------|
| 1     | 12 wt% HBr   | r.t.   | 20    | 0                      | 0                          |
| 2     | 12 wt% HBr   | r.t.   | 48    | <5%                    | 0                          |
| 3     | 3 wt% HBr    | 80     | 3     | <5%                    | 0                          |
| 4     | 4.8% wt% HBr | 90     | 4     | 83                     | 71                         |
| 5     | 6 wt% HBr    | 100    | 2     | 98                     | 81                         |
| 6     | 6 wt% HBr    | 100    | 4     | 100                    | 83                         |

Reaction conditions: 0.1 g creosol, 6.1 g LiBr, and 3.9 g water.

**Table S2** <sup>1</sup>H-NMR and GPC analysis of demethylated organosolv ethanol poplar lignin (EPL) <sup>a</sup>

| Entry           | Temperature (°C) | Time (h) | LiBr (wt%) | OMe (mmol/g) | ArOH (mmol/g) | AlkOH (mmol/g) | M <sub>n</sub> | M <sub>w</sub> | PDI  |
|-----------------|------------------|----------|------------|--------------|---------------|----------------|----------------|----------------|------|
| 1               | Original         | Original | 61         | 7.87         | 3.65          | 3.97           | 1080           | 2500           | 2.31 |
| 2               | 100              | 4        | 53         | 2.19         | 8.27          | 5.10           | 1620           | 2840           | 1.76 |
| 3 <sup>a</sup>  | 100              | 4        | 0          | 1.27         | 5.09          | 5.82           | 1630           | 2960           | 1.82 |
| 4               | 50               | 4        | 53         | 7.32         | 4.07          | 5.14           | 1050           | 1450           | 1.38 |
| 5               | 75               | 4        | 53         | 5.06         | 6.35          | 5.37           | 1270           | 1930           | 1.52 |
| 6               | 120              | 4        | 53         | 1.63         | 8.54          | 6.20           | 1650           | 3140           | 1.90 |
| 7               | 100              | 8        | 53         | 1.12         | 8.11          | 6.84           | 1670           | 2920           | 1.75 |
| 8               | 100              | 24       | 53         | 0.542        | 6.55          | 4.88           | 1600           | 2750           | 1.72 |
| 9 <sup>b</sup>  | 100              | 4        | 30         | 7.79         | 4.79          | 3.67           | 1330           | 2320           | 1.75 |
| 10 <sup>b</sup> | 100              | 4        | 40         | 6.45         | 5.42          | 4.77           | 1300           | 2210           | 1.70 |
| 11 <sup>b</sup> | 100              | 4        | 47         | 3.76         | 7.43          | 5.73           | 1600           | 2770           | 1.73 |
| 12 <sup>b</sup> | 100              | 4        | 61         | 1.38         | 8.38          | 6.52           | 1670           | 2830           | 1.70 |

All reactions and NMR tests are conducted in duplicates except for Entry 1 and 2 (triplicates) and 9-12 (single). Reaction conditions: 0.5 g EPL, 6.1 g LiBr, 3.9 mL water, and 1 mL 48% HBr. a: 7.75 mL (11.5 g) 48% HBr. b: 10 g aqueous LiBr with different concentrations, 1 mL 48% HBr.

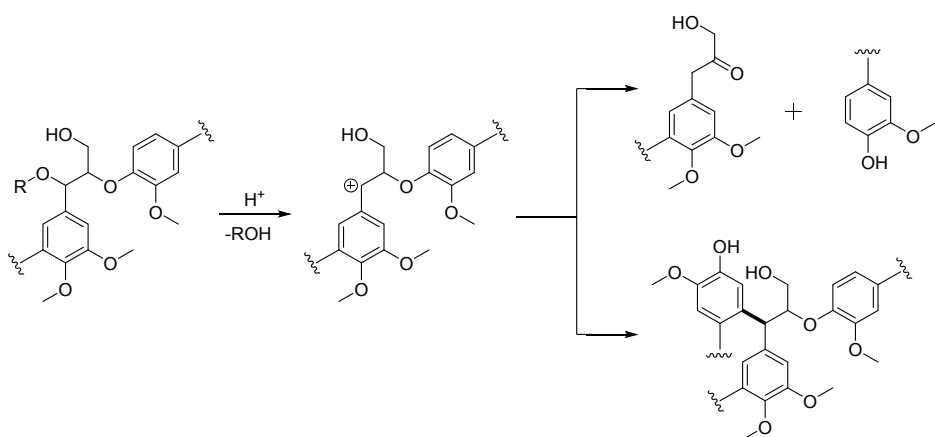**Scheme S1** Competition between the depolymerization by cleaving  $\beta$ -O-4 structure and the repolymerization via the condensation between the  $\alpha$ -carbocation and a reactive aromatic carbon <sup>1</sup>.

**Table S3** Effect of co-solvent on demethylation of ethanol poplar lignin in the ACLB system

| Entry | Co-solvent      | OMe<br>(mmol/g)   | ArOH<br>(mmol/g) | AlkOH<br>(mmol/g) | M <sub>n</sub> | M <sub>w</sub> | PDI  |
|-------|-----------------|-------------------|------------------|-------------------|----------------|----------------|------|
| 1     | Original lignin | 7.87              | 3.65             | 3.97              | 1080           | 2500           | 2.31 |
| 2     | None            | 2.19              | 8.27             | 5.10              | 1620           | 2840           | 1.76 |
| 3     | Acetic acid     | 1.43              | 7.61             | 6.11              | 1410           | 2860           | 2.03 |
| 4     | Ethanol         | 6.58 <sup>a</sup> | 5.18             | 2.67              | 1280           | 2100           | 1.65 |
| 5     | Acetone         | 1.90              | 7.25             | 4.36              | 1530           | 2780           | 1.83 |

Reaction conditions: 0.5 g EPL, 6.1 g LiBr, 3.9 g solvent (absolute water or 3.4 g water and 0.5 g co-solvent), 1 mL 48 wt% HBr, 100 °C, and 4 h. a: the signals of OMe and OEt are supposed to be overlapped from 4.1 to 3.1 ppm.

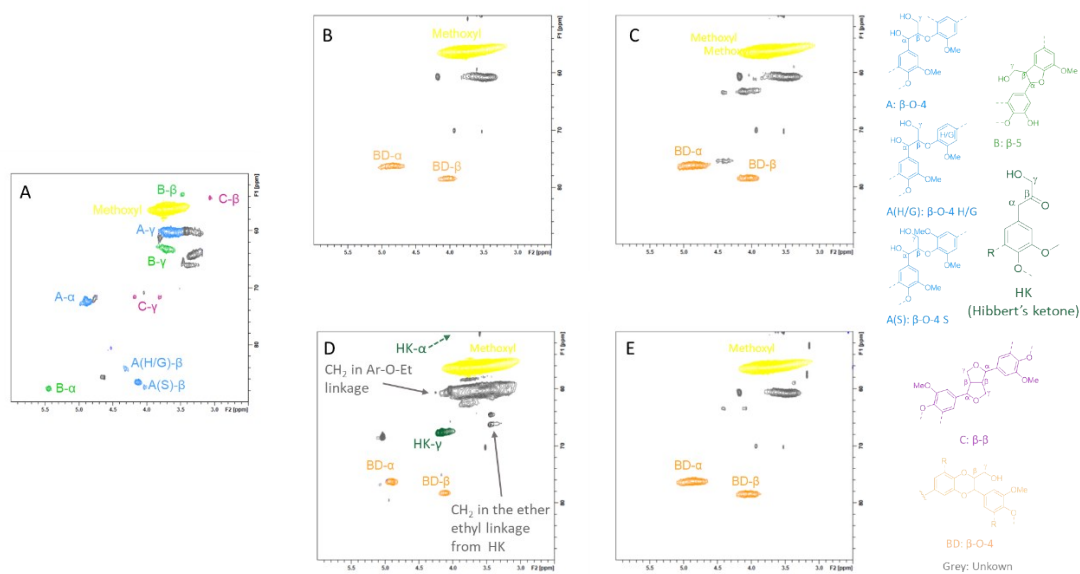

**Figure S1** Aliphatic region of the HSQC spectra of original and demethylated EPL in DMSO-d<sub>6</sub>. A: original EPL; B: demethylated EPL in the ACLB without co-solvents; C: demethylated EPL in the ACLB with acetic acid; D: demethylated EPL in the ACLB with ethanol; E: demethylated EPL in the ACLB with acetone. Reaction conditions: 0.5 g lignin, 6.1 g LiBr, 3.9 g solvent (absolute water or water and 0.5 g co-solvent), 1 mL HBr, 100 °C, and 4 h.

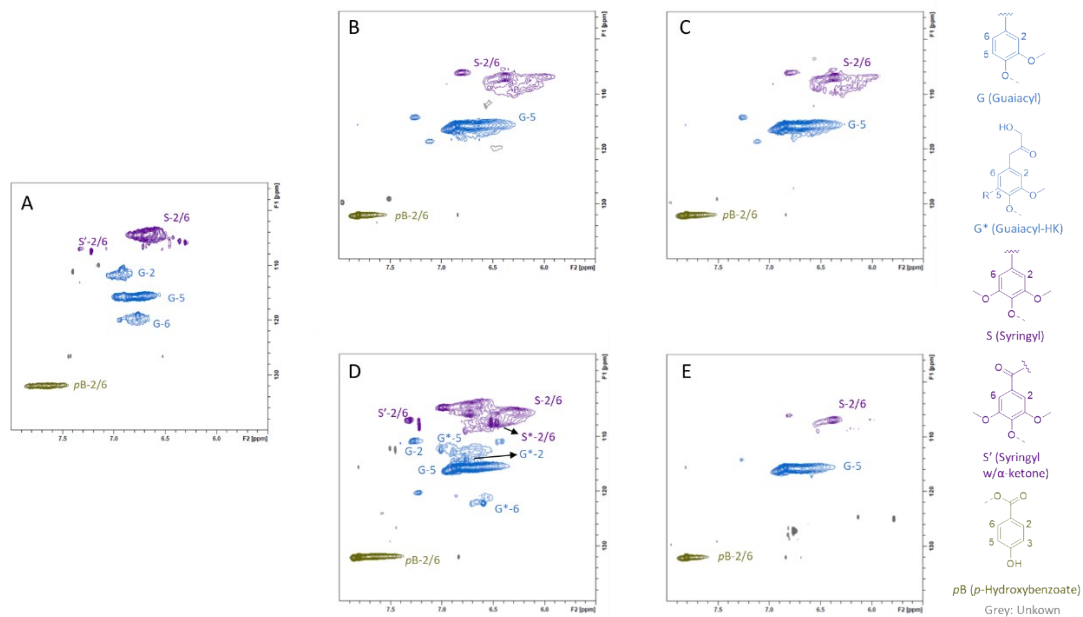

**Figure S2** Aromatic region of the HSQC spectra of original and demethylated EPL in DMSO-d<sub>6</sub>. A: original EPL; B: demethylated EPL in the ACLB without co-solvents; C: demethylated EPL in the ACLB with acetic acid; D: demethylated EPL in the ACLB with ethanol; E: demethylated EPL in the ACLB with acetone. Reaction conditions: 0.5 g lignin, 6.1 g LiBr, 3.9 g solvent (absolute water or water and 0.5 g co-solvent), 1 mL HBr, 100 °C, and 4 h.

**Table S4** Detailed <sup>1</sup>H NMR and GPC results of the four typical lignin samples<sup>a</sup>

| Lignin | Status       | OMe (mmol/g) | ArOH (mmol/g) | AlkOH (mmol/g) | M <sub>n</sub> | M <sub>w</sub> | PDI  |
|--------|--------------|--------------|---------------|----------------|----------------|----------------|------|
| HKL    | Original     | 7.56 (0.698) | 5.05 (0.463)  | 4.06 (0.259)   | 850            | 1150           | 1.35 |
|        | Demethylated | 1.36 (0.279) | 7.40 (1.74)   | 4.58 (1.23)    | 1330           | 2300           | 1.73 |
| CSL    | Original     | 4.50 (0.378) | 2.85 (0.286)  | 2.53 (0.195)   | 630            | 1090           | 1.72 |
|        | Demethylated | 1.39 (0.204) | 4.13 (0.522)  | 2.58 (0.313)   | 1370           | 3080           | 2.25 |
| ELPPL  | Original     | 5.76 (0.401) | 3.23 (0.148)  | 4.70 (0.130)   | 1170           | 3200           | 2.73 |
|        | Demethylated | 1.01 (0.403) | 4.00 (1.06)   | 3.33 (0.762)   | 1600           | 4810           | 3.00 |
| EPL    | Original     | 7.87 (0.670) | 3.65 (0.354)  | 3.97 (0.397)   | 1080           | 2500           | 2.31 |
|        | Demethylated | 2.19 (0.455) | 8.27 (0.225)  | 5.10 (0.693)   | 1620           | 2840           | 1.76 |

a: All reactions and NMR tests were conducted in triplicate. The standard deviations are listed in the brackets. Reaction conditions: 0.5 g lignin, 6.1 g LiBr, 3.9 mL water, and 1 mL 48% HBr, 100 °C, and 4 h.

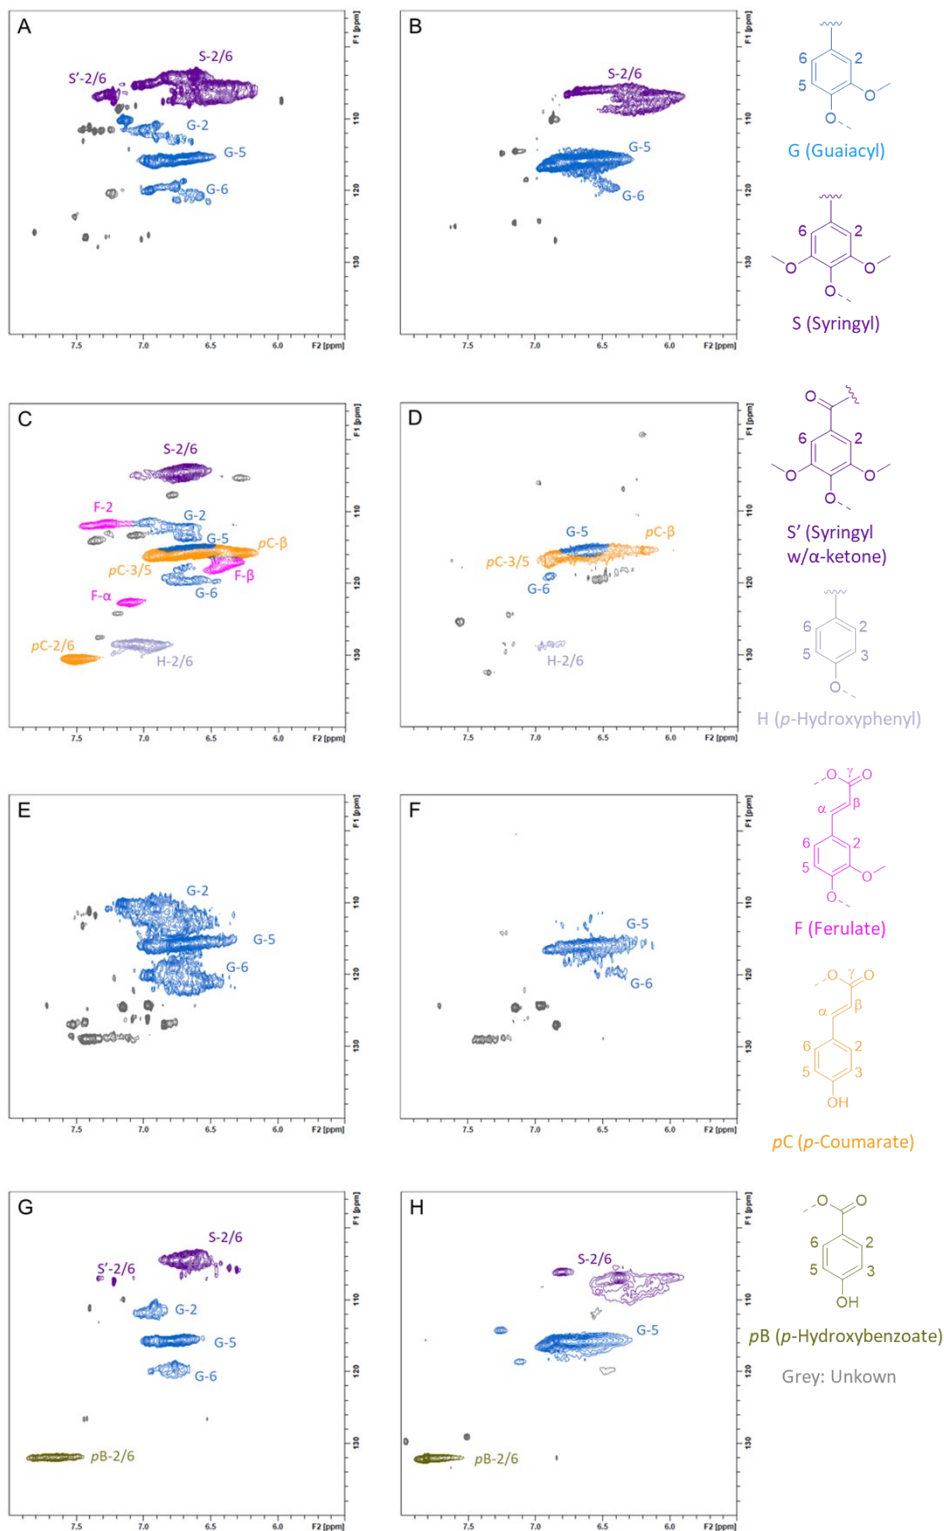

**Figure S3** Aromatic region of the HSQC spectra of original and demethylated lignin samples in DMSO-d<sub>6</sub>. A: original HKL; B: demethylated HKL; C: original CSL; D: demethylated CSL; E: original ELPL; F: demethylated ELPL; G: original EPL; H: demethylated EPL. Reaction conditions: 0.5 g lignin, 6.1 g LiBr, 3.9 g water, 1 mL HBr, 100 °C, and 4 h.

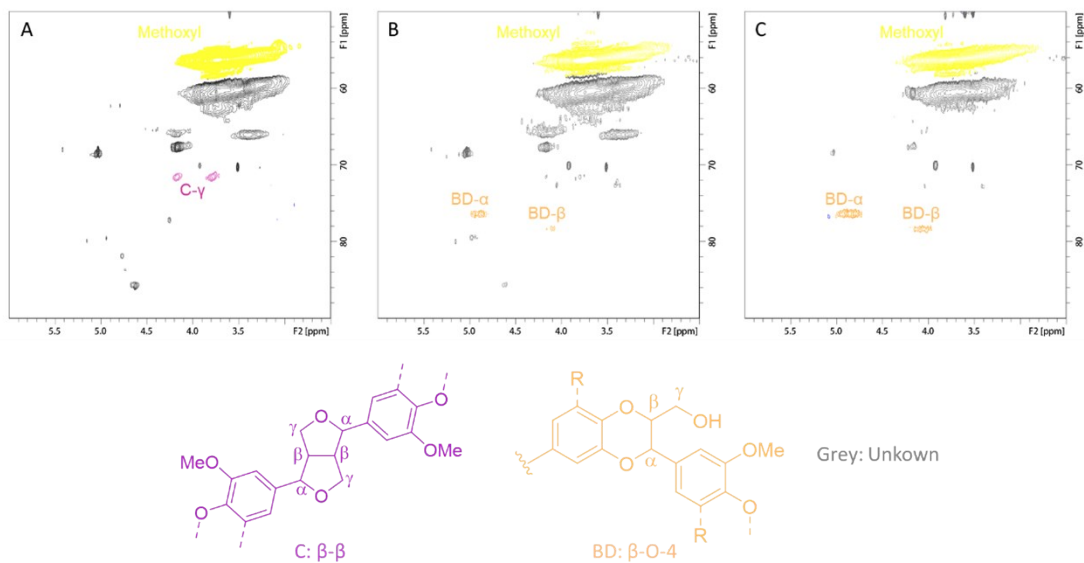

**Figure S4** Aliphatic region of the HSQC spectra of the demethylated EPL in the ACLB with different concentrations of LiBr (A: 30% LiBr; B: 40% LiBr; C: 47% LiBr). The solvent was in DMSO-d<sub>6</sub>. Reaction conditions: 0.5 g lignin, 10 g aqueous LiBr with different concentrations, 1 mL HBr, 100 °C, and 4 h.

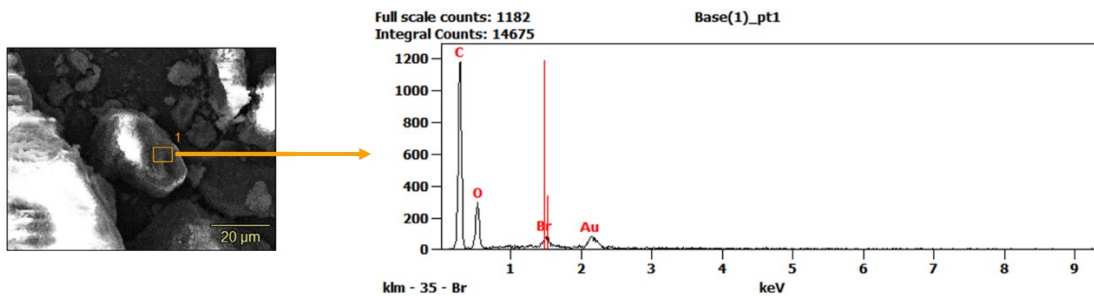

**Figure S5** SEM-EDS spectrum of demethylated EPL.

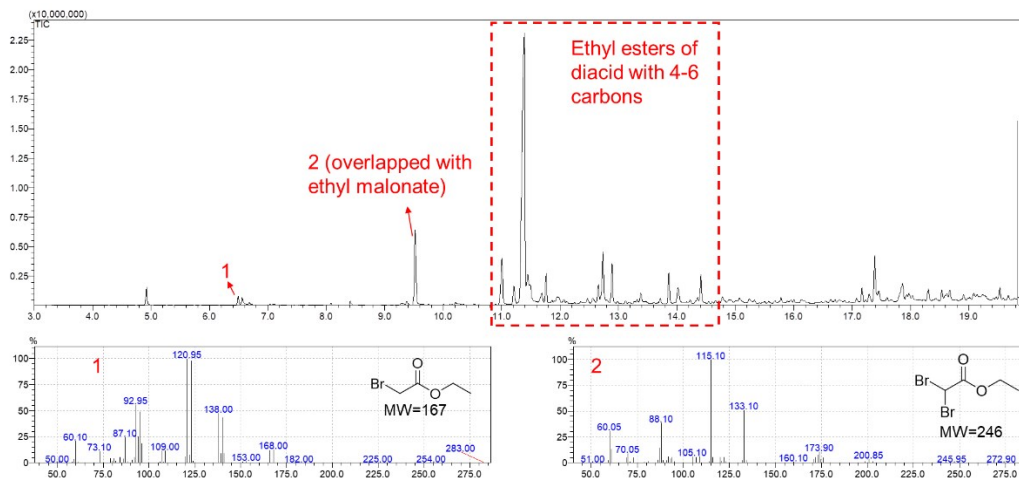

**Figure S6** GC-MS spectrum of the esterified oxidation mixture of demethylated EPL. Reaction conditions: 0.4 g water-washed demethylated lignin, 5 mL  $\text{H}_2\text{SO}_4$  (3 mol/L), 5 mL 30%  $\text{H}_2\text{O}_2$ , 100 °C, 4 h 40 min. The reaction mixture was diluted with 50 mL ethanol, dehydrated over 12.78 g  $\text{Na}_2\text{SO}_4$ , and then esterified at 60 °C overnight.

## References

1. J. Li, G. Henriksson and G. Gellerstedt, *Bioresour Technol*, 2007, **98**, 3061-3068.
